# Supplementary material
Source: Springer Nature journal article supplement (https://www.springermedizin.de/resource/supplementary/13643_2013_223_MOESM6_ESM.pdf/9681846)
Supplement: MOESM6 [file 9681846]

Additional file 6: *Potentially relevant ongoing trials*

| Identifier, Start date (estimated completion date)                                                    | Study Name                                                                                                                          | Methods               | Participants                                                                                       | Intervention                                                                                      | Control                                                   | Outcomes                                          | Contact Information                          | Notes                       |
|-------------------------------------------------------------------------------------------------------|-------------------------------------------------------------------------------------------------------------------------------------|-----------------------|----------------------------------------------------------------------------------------------------|---------------------------------------------------------------------------------------------------|-----------------------------------------------------------|---------------------------------------------------|----------------------------------------------|-----------------------------|
| HSRP20081113<br><br>July 2007 ( June 2010)                                                            | Brief intervention to reduce substance use in South African primary care                                                            | RCT, South Africa     | 18-24 y. Public primary health care clinic.                                                        | Brief motivational intervention                                                                   | NR                                                        | Reduce hazardous drug and alcohol use             | Jennifer Mertens<br>jennifer.mertens@kp.org  | Source: NLM Gateway         |
| NCT01501318<br><br>February 2012 (Completed November 2012 – no published reports as of December 2013) | Brief education to reduce health care consumers' risky substance use behaviors: How brief is brief?                                 | RCT, United States    | 40 participants 18 y or older. Emergency room.                                                     | Brief motivational interview, one session (5-15 min), plus personalized feedback report           | Personalized feedback report                              | Substance use behaviors, consequences, intentions | Matthew G Hile, PhD<br>matthew.hile@mimh.edu | Source: clinical trials.gov |
| HSRP20101044<br><br>September 2009 (September 2012)                                                   | Comparative effectiveness and feasibility of screening, brief intervention and referral services (SBIRT) in a general dental clinic | 2y RCT, United States | 1175 participants who are smokers and at-risk substance users. General, academic dentistry clinic. | 1) Brief intervention for smokers only<br>2) Brief intervention for smoking + other substance use | Wait-list that includes general dental health counselling | Not specified                                     | TF Babor<br>babor@nso.uchc.edu               | Source: NLM Gateway         |

| Identifier, Start date (estimated completion date)                                               | Study Name                                                                                      | Methods                      | Participants                                                                                                                                                                                  | Intervention                                                                                                                                                                       | Control                                                                               | Outcomes                                                                                                                                  | Contact Information                                   | Notes                                              |
|--------------------------------------------------------------------------------------------------|-------------------------------------------------------------------------------------------------|------------------------------|-----------------------------------------------------------------------------------------------------------------------------------------------------------------------------------------------|------------------------------------------------------------------------------------------------------------------------------------------------------------------------------------|---------------------------------------------------------------------------------------|-------------------------------------------------------------------------------------------------------------------------------------------|-------------------------------------------------------|----------------------------------------------------|
| NCT01207791<br><br>October 2010 (Completed June 2012 - no published reports as of December 2013) | Screening, motivational assessment, referral, and treatment in emergency departments (SMART-ED) | Multisite RCT, United States | 1285 participants<br>18 y or older<br>screened positive for use of a non-alcohol, non-nicotine substance.<br>Emergency department.                                                            | (1) Screening, assessment, referral to treatment, and written information<br>(2) Brief intervention (30-min) and written information + two telephone boosters (15-min each)        | Minimal screening only                                                                | Frequency of use, quantity of use, change in substance, negative consequences of use, decision to attend treatment, other health care use | Alyssa A Forcehimes, Ph.D.<br>aforcehimes@comcast.net | Source: Clinical Trials.gov, Bogenschutz 2011 {92} |
| NCT00876941<br><br>April 2009 (March 2013)                                                       | Assessing screening plus brief interventions's resulting efficacy (ASPIRE) to stop drug use     | RCT, United States           | 450 participants<br>18y or older with ASSIST score of >4 for drug use.<br>200 participants with ASSIST score of 2-3 will be included in secondary and exploratory analyses.<br>Hospital-based | (1) Enhanced brief intervention. One in-person session plus optional telephone booster call, each 30-45 min.<br>(2) Standard brief intervention. One in-person session, 10-15 min. | Informed that at risk of substance use hazards + written list of available resources. | Substance use, substance use consequences, HIV risk behaviours, substance use treatment use, costs.                                       | Richard Saitz, MD<br>Boston Medical Center            | Source: Clinical trials.gov                        |

| Identifier, Start date (estimated completion date) | Study Name                                                                                                                               | Methods            | Participants                                                                                           | Intervention                                                                                                         | Control                                                     | Outcomes                                                                                           | Contact Information                              | Notes                       |
|----------------------------------------------------|------------------------------------------------------------------------------------------------------------------------------------------|--------------------|--------------------------------------------------------------------------------------------------------|----------------------------------------------------------------------------------------------------------------------|-------------------------------------------------------------|----------------------------------------------------------------------------------------------------|--------------------------------------------------|-----------------------------|
|                                                    |                                                                                                                                          |                    | primary care practice.                                                                                 |                                                                                                                      |                                                             |                                                                                                    |                                                  |                             |
| HSRP20101435<br><br>September 2008 (June 2013)     | Computer versus therapist-delivered brief intervention for drug abuse in primary care                                                    | RCT, United States | 680 participants at risk for heavy or problem alcohol and drug use. Primary care setting assumed.      | (1) Therapist-delivered brief intervention<br>(2) Computer-delivered brief intervention                              | (1) Computer-delivered health screen<br>(2) Assessment only | Substance use, economic outcomes                                                                   | Svikis DS<br>dssvikis@vcu.edu                    | Source: NLM Gateway         |
| NCT00913770<br><br>September 2008 (June 2013)      | Models of screening, brief intervention with a facilitated referral to treatment (SBIRT) for opioid patients in the emergency department | RCT, United States | 360 participants 18 y or older with opioid dependence and positive urine screen. Emergency department. | (1) Brief intervention with facilitated referral to treatment<br>(2) Brief intervention plus buprenorphine treatment | Handout (local substance use treatment centres)             | Substance use treatment program, opioid use, HIV risk behaviours, health care service utilization. | Gail D'Onofrio, MD, MS<br>gail.donofrio@yale.edu | Source: Clinical Trials.gov |

| Identifier, Start date (estimated completion date) | Study Name                                                                                                                                 | Methods                      | Participants                                                             | Intervention                                                                                                                                    | Control                                                                                                                       | Outcomes                                                                                   | Contact Information                                                                                            | Notes                       |
|----------------------------------------------------|--------------------------------------------------------------------------------------------------------------------------------------------|------------------------------|--------------------------------------------------------------------------|-------------------------------------------------------------------------------------------------------------------------------------------------|-------------------------------------------------------------------------------------------------------------------------------|--------------------------------------------------------------------------------------------|----------------------------------------------------------------------------------------------------------------|-----------------------------|
| NCT01003834<br><br>November 2010 (September 2013)  | Computerized screening, brief intervention, and referral to treatment in primary care (SBIRT)                                              | RCT, United States           | 680 participants 18-65 y with substance use. Primary care clinic.        | 1) Computer-delivered brief intervention based on motivational interviewing<br>2) Therapist-delivered motivational intervention                 | (1) Computerized health screening only (standard care)<br>(2) Computerized health screening and substance use assessment only | Substance use, medical and psychosocial functioning, economic outcomes.                    | Pam Dillon, PharmD<br>804-827-1519<br>pmdillon@vcu.edu<br><br>Lynn Hull, PhD<br>804-828-5596<br>hulllc@vcu.edu | Source: Clinical trials.gov |
| HSRP20101141<br><br>Aug 2009 (May 2014)            | Optimizing screening, brief interventions, and referral to treatment (SBIRT) for drug-using patients in an inner-city emergency department | Factorial RCT, United States | 900 patients 18-60y, screen positive for drug use. Emergency department. | (1) Computer-delivered brief intervention + written information<br>(2) Intervener-delivered brief intervention<br>Intervener brief intervention | Enhance usual care + written information<br><br>Second phase randomization to adapted motivational enhance                    | Drug use, other health measures (including physical and mental health, HIV risk behaviour) | Blow FC<br>fredblow@umich.edu                                                                                  | Source: NLM Gateway         |

| Identifier, Start date (estimated completion date) | Study Name                                                                                  | Methods                           | Participants                                                                 | Intervention                                                                                                                                                                        | Control                                                                                      | Outcomes                           | Contact Information                                    | Notes                       |
|----------------------------------------------------|---------------------------------------------------------------------------------------------|-----------------------------------|------------------------------------------------------------------------------|-------------------------------------------------------------------------------------------------------------------------------------------------------------------------------------|----------------------------------------------------------------------------------------------|------------------------------------|--------------------------------------------------------|-----------------------------|
|                                                    |                                                                                             |                                   |                                                                              | + written information<br><br>Second phase randomization to adapted motivational enhancement therapy or enhanced usual care to be delivered two months following initial allocation. | ment therapy or enhanced usual care to be delivered two months following initial allocation. |                                    |                                                        |                             |
| NCT01433692<br><br>March 2012 (July 2014)          | CANABIC: CANnabis and Adolescents, a Brief Intervention to reduce their Consumption         | Cluster RCT, 3 regions in France. | 750 participant 15-25 y with cannabis consumption. Primary care practices.   | Brief intervention                                                                                                                                                                  | No intervention                                                                              | Cannabis, tobacco, alcohol use.    | Patrick Lacarin placarin@chuc-lermontferrand.fr        | Source: Clinical Trials.gov |
| NCT01532934<br><br>August 2009 (July 2014)         | The impact of psychopathic traits on the efficacy of a brief intervention for substance use | RCT, United States                | 120 participants 18 y or older who are offenders in a jail diversion program | Brief motivational enhancement , four sessions (45-min each)                                                                                                                        | Standard Care                                                                                | Criminal recidivism, substance use | Marc T. Swogger, Ph.D. marc_swogger@urmc.rochester.edu | Source: Clinical Trials.gov |

| Identifier, Start date (estimated completion date) | Study Name                                                              | Methods                      | Participants                                                                                                                                         | Intervention                                                                                                      | Control                 | Outcomes                                                                                                                                                     | Contact Information                                                                                   | Notes                       |
|----------------------------------------------------|-------------------------------------------------------------------------|------------------------------|------------------------------------------------------------------------------------------------------------------------------------------------------|-------------------------------------------------------------------------------------------------------------------|-------------------------|--------------------------------------------------------------------------------------------------------------------------------------------------------------|-------------------------------------------------------------------------------------------------------|-----------------------------|
| NCT00877331<br>April 2009 (September 2014)         | Brief intervention in primary care for problem drug use and abuse       | RCT, United States           | 1000 participants 18 y and older using recreational drugs or prescription drugs not as prescribed in past 3 mo                                       | Brief intervention (motivational interviewing). One in-person session, 30-45 min, plus 1-wk brief telephone call. | Enhanced care as usual. | Substance use, treatment program attendance, intervention fidelity, negative consequences of use, other health measures, costs.                              | Principal Investigator: Peter P Roy-Byrne, MD University of Washington                                | Source: Clinical Trials.gov |
| NCT01124591<br>June 2010 (December 2014)           | Brief intervention for drug misuse in the emergency department (BIDMED) | Multisite RCT, United States | 1100 participants 18-64 y with subcritical illness or injury and illicit or prescription drug misuse. Academic trauma centre and community hospital. | Brief motivational intervention, two sessions                                                                     | Screening only          | Drug misuse, behaviours associated with drug misuse, physical and psychosocial health, socioeconomic consequences, uptake of HIV and hepatitis B/C screening | Roland C Merchant, MD, ScD<br>rmerchant@lifespan.org<br><br>Janette Baird, PhD<br>jbaird@lifespan.org | Source: Clinical Trials.gov |

| Identifier, Start date (estimated completion date)        | Study Name                                                                                                                                       | Methods            | Participants                                                                                           | Intervention                                                                                | Control                                                   | Outcomes                                                                       | Contact Information                                                                        | Notes                                                   |
|-----------------------------------------------------------|--------------------------------------------------------------------------------------------------------------------------------------------------|--------------------|--------------------------------------------------------------------------------------------------------|---------------------------------------------------------------------------------------------|-----------------------------------------------------------|--------------------------------------------------------------------------------|--------------------------------------------------------------------------------------------|---------------------------------------------------------|
| NCT01597856<br><br>December 2012 (December 2016)          | Evaluation and treatment of substance use in veterans with PTSD disability claims                                                                | RCT, United States | 640 military veterans 18-65 y applying for post-traumatic stress disorder disability claim             | Brief intervention                                                                          | No intervention                                           | Attending treatment, substance use, severity of post-traumatic stress disorder | Marc I Rosen, MD<br>marc.rosen@va.gov<br><br>Theodore Speroff, PhD<br>ted.speroff@va.gov   | Source: ClinicalTrials.gov                              |
| ACTRN12611000136909<br><br>March 30, 2010 (none provided) | The Ecstasy Check-up: A multi-site trial of a brief intervention for ecstasy use                                                                 | Multisite RCT      | 175 participants 16 y or older, ecstasy use                                                            | Brief intervention (motivational interviewing), one session plus written information        | Written information (educational factsheet about ecstasy) | Ecstasy use, Client satisfaction of E Check Up discussion.                     | Dr Laila Khawar<br>l.khawar@unsw.edu.au<br><br>Dr Melissa Norberg<br>m.norberg@unsw.edu.au | Source: Australian New Zealand Clinical Trials Registry |
| NR<br><br>NR                                              | Health services interventions for patients in the emergency department with alcohol and/or drug use disorders: findings from Project Health Link | RCT                | 1141 patients, abuse or dependence on alcohol, cannabis, stimulants, or opioids. Emergency department. | (1) 5-session case management intervention<br>(2) 2-session brief motivational intervention | Brochure                                                  | Linkage to substance use assessment, referral, and treatment entry             | Not reported                                                                               | Abstract <sup>A</sup>                                   |

Abbreviations: HIV= human immunodeficiency virus; min=minutes; mo= months; NLM=National Library of Medicine; NR=Not reported; PTSD=post-traumatic stress disorder; RCT=randomized controlled trial; wk; weeks; y=year.

<sup>A</sup> Identified as a conference abstract: Massey, L. S., Walton, M. A., Booth, B. M., Barry, K. L., Cunningham, R. M., Chermack, S. T., and Blow, F. C. Alcoholism: Clinical and Experimental Research 2011;35:144A. Abstract no 0534. Supported by NIAAA #AA014665 and NIDA #DA016591
